# Supplementary material for: Adaptive staffing can mitigate essential worker disease and absenteeism in an emerging epidemic
Source: PubMed Central journal article supplement (PMC8403949; doi:10.1073/pnas.2105337118), 2021-08-16
Supplement: pnas.2105337118.sapp.pdf [file pnas.2105337118.sapp.pdf]

1

## 2 **Supplementary Information for**

### 3 **Adaptive staffing can mitigate essential worker disease and absenteeism in an emerging** 4 **epidemic**

5 **Elliot Aguilar, Nicholas Roberts, Ismail Uluturk, Patrick Kaminski, John W Barlow, Andreas G. Zori, Laurent Hébert-Dufresne,**  
6 **Benjamin D. Zusman**

7 **Benjamin D. Zusman.**

8 **E-mail: [benjamin.zusman@medicine.ufl.edu](mailto:benjamin.zusman@medicine.ufl.edu)**

#### 9 **This PDF file includes:**

- 10     Supplementary text
- 11     Legends for Dataset S1 to S2
- 12     SI References

#### 13 **Other supplementary materials for this manuscript include the following:**

- 14     Datasets S1 to S2



50 a measure of the correlation in  $SI$  pairs. When  $C_{SI} = 1$ ,  $SI$  pairs are formed purely at random; for any  $C_{SI}$  greater than 1,  $S$   
 51 and  $I$  individuals are more likely than random to be paired.

52 Using this measure of the correlation, we can rewrite the equation for  $d[I]/dt$ ,

$$53 \quad \frac{d}{dt}[I] = \beta \frac{[S][I]\bar{k}}{N} C_{SI} - (\epsilon + \gamma_I - r_I \epsilon)[I] - r_I \gamma_Q [Q]. \quad [7]$$

54 We then can solve for  $R_0$ ,

$$55 \quad R_0 = \frac{\beta \bar{k}}{\epsilon(r_S + r_R) + \gamma_I} C_{SI}, \quad [8]$$

56 where, as pointed out by (2), we must consider the quasi-equilibrium value,  $C_{SI}^*$ , that forms in the early period of the epidemic.  
 57 Importantly,  $R_0$  grows as  $C_{SI}^*$ , which again measures the correlation in  $SI$  pairs. Examining the ‘decay’ of  $C_{SI}$  in the early  
 58 period of the epidemic,

$$59 \quad \frac{d}{dt} C_{SI} = \frac{N}{\bar{k}} \frac{d}{dt} \left( \frac{[SI]}{[S][I]} \right) \rightarrow \beta(\bar{q} - 2)C_{SI} + r_S \epsilon \frac{[I]}{[S]} C_{IX} - \beta \bar{k} C_{SI}^2 \quad [9]$$

60 as  $[S] \rightarrow N$ ,  $[I] \rightarrow 1$ ,  $[Q] \rightarrow 0$ . We can see that the quasi-equilibrium value of  $C_{SI}^*$  depends on  $\frac{[I]}{[S]} C_{IX}$ , (note: while  $\frac{[I]}{[S]} \rightarrow 0$  in  
 61 the limit,  $C_{IX} \rightarrow \infty$ ). Considering the decay of this term,

$$62 \quad \frac{d}{dt} \left( \frac{[I]}{[S]} C_{IX} \right) = \frac{2N}{\bar{k}} \frac{d}{dt} \left( \frac{[II]}{[S][I]} \right) \rightarrow \frac{[I]}{[S]} C_{IX} (\beta \bar{k} + \epsilon(r_S + r_R) + \gamma_I) + 2\beta C_{SI} \quad [10]$$

63 and thus,

$$64 \quad \frac{[I]}{[S]} C_{IX} \rightarrow \frac{2\beta C_{SI}}{\beta \bar{k} C_{SI} + \epsilon(r_S + r_R) + \gamma_I}. \quad [11]$$

65 Substituting this value into eq. 10, we see that  $C_{SI}^*$  must satisfy,

$$66 \quad \beta(\bar{q} - 2)C_{SI}^* - \beta \bar{k} C_{SI}^{*2} + \frac{2\beta C_{SI}^*}{\beta \bar{k} C_{SI}^* + \epsilon(r_S + r_R) + \gamma_I} = 0. \quad [12]$$

67 **Redistribution Model.** Again, we model a network-structured population in which infectious individuals are diagnosed, with rate  
 68  $\epsilon$ , and sequestered (i.e. sent to  $Q$ ), where they recover with rate  $\gamma_Q$ , and return to the population. In the current model,  
 69 sequestered individuals are not replaced; instead their network edges are reassigned to non-sequestered individuals at random.

70 The model leads to the following system of compartmental equations,

$$71 \quad \frac{d}{dt}[S] = -\beta[SI]$$

$$72 \quad \frac{d}{dt}[I] = \beta[SI] - (\epsilon + \gamma_I)[I]$$

$$73 \quad \frac{d}{dt}[R] = \gamma_Q[Q] + \gamma_I[I]$$

$$74 \quad \frac{d}{dt}[Q] = \epsilon[I] - \gamma_Q[Q]$$

75

76 We then have the following system of pair equations:

$$\begin{aligned}
77 \quad \frac{d}{dt}[SI] &= \beta[SSI] - 2\beta[ISI] - \beta[SI] - \gamma_I[SI] - \epsilon[SI] \frac{[S] + [R]}{[S] + [I] + [R]} \\
78 \quad &\quad - \gamma_q[Q]\bar{k} \frac{[SI]}{[SI] + [SS] + [SR] + [IR] + [II] + [RR]} \\
79 \quad \frac{d}{dt}[SS] &= -\beta[SSI] + \epsilon[SI] \frac{[S]}{[S] + [I] + [R]} - \gamma_q[Q]\bar{k} \frac{[SS]}{[SI] + [SS] + [SR] + [IR] + [II] + [RR]} \\
80 \quad \frac{d}{dt}[SR] &= \gamma_I[SI] - \beta[ISR] + \epsilon \left( [SI] \frac{[R]}{[S] + [I] + [R]} + [IR] \frac{[S]}{[S] + [I] + [R]} \right) \\
81 \quad &\quad + \gamma_q[Q]\bar{k} \left( \frac{[S]}{[S] + [I] + [R]} - \frac{[SR]}{[SI] + [SS] + [SR] + [IR] + [II] + [RR]} \right) \\
82 \quad \frac{d}{dt}[IR] &= \beta[ISR] + 2\gamma_I[II] - \gamma_I[IR] + \epsilon \left( 2[II] \frac{[R]}{[S] + [I] + [R]} - [IR] \frac{[S] + [R]}{[S] + [I] + [R]} \right) \\
83 \quad &\quad + \gamma_q[Q]\bar{k} \left( \frac{[I]}{[S] + [I] + [R]} - \frac{[IR]}{[SI] + [SS] + [SR] + [IR] + [II] + [RR]} \right) \\
84 \quad \frac{d}{dt}[II] &= \beta[SI] + 2\beta[ISI] - 2 \left( \epsilon \frac{[S] + [R]}{[S] + [I] + [R]} + \gamma_I \right) [II] - \gamma_q[Q]\bar{k} \frac{[II]}{[SI] + [SS] + [SR] + [IR] + [II] + [RR]} \\
85 \quad \frac{d}{dt}[RR] &= \gamma_I[IR] + \epsilon[IR] \frac{[R]}{[S] + [I] + [R]} + \gamma_q[Q]\bar{k} \left( \frac{[R]}{[S] + [I] + [R]} - \frac{[RR]}{[SI] + [SS] + [SR] + [IR] + [II] + [RR]} \right) \\
86 \quad \frac{d}{dt}\bar{k} &= \frac{-2([SI] + [SS] + [SR] + [IR] + [II] + [RR]) * \left( \frac{d}{dt}[S] + \frac{d}{dt}[I] + \frac{d}{dt}[R] \right)}{([S] + [I] + [R])^2} \\
87 \quad &
\end{aligned}$$

88 After applying the triple closures, we can re-express the above as,

$$\begin{aligned}
89 \quad \frac{d}{dt}[SI] &= 2\beta \frac{(\bar{q} - 1)}{\bar{k}} [SS] \frac{[SI]}{[S]} - \beta \frac{(\bar{q} - 1)}{\bar{k}} \frac{[SI]^2}{[S]} - \beta[SI] - \gamma_I[SI] - \epsilon[SI] \frac{[S] + [R]}{[S] + [I] + [R]} + 2\epsilon[II] \frac{[S]}{([S] + [I] + [R])} \\
90 \quad &\quad - \gamma_q[Q]\bar{k} \frac{[SI]}{[SI] + [SS] + [SR] + [IR] + [II] + [RR]} \\
91 \quad \frac{d}{dt}[SS] &= -2\beta \frac{(\bar{q} - 1)}{\bar{k}} [SS] \frac{[SI]}{[S]} + \epsilon[SI] \frac{[S]}{[S] + [I] + [R]} - \gamma_q[Q]\bar{k} \frac{[SS]}{[SI] + [SS] + [SR] + [IR] + [II] + [RR]} \\
92 \quad \frac{d}{dt}[SR] &= \gamma_I[SI] - \beta \frac{(\bar{q} - 1)}{\bar{k}} [SI] \frac{[SR]}{[S]} + \epsilon \left( [SI] \frac{[R]}{[S] + [I] + [R]} + [IR] \frac{[S]}{[S] + [I] + [R]} \right) \\
93 \quad &\quad + \gamma_q[Q]\bar{k} \left( \frac{[S]}{[S] + [I] + [R]} - \frac{[SR]}{[SI] + [SS] + [SR] + [IR] + [II] + [RR]} \right) \\
94 \quad \frac{d}{dt}[IR] &= \beta \frac{(\bar{q} - 1)}{\bar{k}} [SI] \frac{[SR]}{[S]} + 2\gamma_I[II] - \gamma_I[IR] + \epsilon \left( 2[II] \frac{[R]}{[S] + [I] + [R]} - [IR] \frac{[S] + [R]}{[S] + [I] + [R]} \right) \\
95 \quad &\quad + \gamma_q[Q]\bar{k} \left( \frac{[I]}{[S] + [I] + [R]} - \frac{[IR]}{[SI] + [SS] + [SR] + [IR] + [II] + [RR]} \right) \\
96 \quad \frac{d}{dt}[II] &= \beta[SI] + \beta \frac{(\bar{q} - 1)}{\bar{k}} \frac{[SI]^2}{[S]} - 2 \left( \epsilon \frac{[S] + [R]}{[S] + [I] + [R]} + \gamma_I \right) [II] - \gamma_q[Q]\bar{k} \frac{[II]}{[SI] + [SS] + [SR] + [IR] + [II] + [RR]} \\
97 \quad \frac{d}{dt}[RR] &= \gamma_I[IR] + \epsilon[IR] \frac{[R]}{[S] + [I] + [R]} + \gamma_q[Q]\bar{k} \left( \frac{[R]}{[S] + [I] + [R]} - \frac{[RR]}{[SI] + [SS] + [SR] + [IR] + [II] + [RR]} \right) \\
98 \quad \frac{d}{dt}\bar{k} &= \frac{-2([SI] + [SS] + [SR] + [IR] + [II] + [RR]) * \left( \frac{d}{dt}[S] + \frac{d}{dt}[I] + \frac{d}{dt}[R] \right)}{([S] + [I] + [R])^2} \\
99 \quad &
\end{aligned}$$

99  $R_0$  is given by,

$$100 \quad R_0 = \frac{\beta\bar{k}}{\epsilon + \gamma_I} C_{SI}. \quad [13]$$

101 Using the same method as above, we have,

$$102 \quad \frac{d}{dt} C_{SI} \rightarrow \beta(\bar{q} - 2) C_{SI} + \epsilon \frac{[I]}{[S]} C_{II} - \beta\bar{k} C_{SI}^2, \quad [14]$$

103 where again we have a dependency on the  $\epsilon \frac{[I]}{[S]} C_{II}$  term. In the limit,

$$104 \quad \frac{[I]}{[S]} C_{II} \rightarrow \frac{2\beta C_{SI}}{\beta \bar{k} C_{SI} + \gamma_I + \epsilon}. \quad [15]$$

105 Thus, our quasi-equilibrium value,  $C_{SI}^*$ , must satisfy the following equation:

$$106 \quad \beta(\bar{q} - 2)C_{SI}^* + \frac{2\epsilon\beta C_{SI}}{\beta \bar{k} C_{SI} + \gamma_I + \epsilon} - \beta \bar{k} C_{SI}^{*2} = 0. \quad [16]$$

107 **Comparison of  $R_0$ .** Let  $R_0^{Rep.}$  be the  $R_0$  value for the replacement model, and  $R_0^{Red.}$  be the  $R_0$  value for the redistribution model.  
 108 We wish to know when  $R_0^{Rep.} > R_0^{Red.}$ .

109 In both models,  $R_0$  depends on the quasi-equilibrium value  $C_{SI}^*$ , which satisfies conditions 12 and 16 for the replacement  
 110 and redistribution models, respectively. Both of these conditions can be re-expressed as quadratic equations in  $C_{SI}^*$ . For the  
 111 redistribution model, the coefficients of this quadratic are:

$$112 \quad \begin{aligned} a_{red.} &= -\beta^2 \bar{k}^2 \\ b_{red.} &= \beta \bar{k} [\beta(\bar{q} - 2) - (\epsilon + \gamma_I)] \\ c_{red.} &= \beta [(\bar{q} - 2)(\epsilon + \gamma_I) + 2\epsilon] \end{aligned} \quad [17]$$

113 and similarly for the replacement model:

$$114 \quad \begin{aligned} a_{rep.} &= -\beta^2 \bar{k}^2 \\ b_{rep.} &= \beta \bar{k} [\beta(\bar{q} - 2) - (\epsilon(r_S + r_R) + \gamma_I)] \\ c_{rep.} &= \beta [(\bar{q} - 2)(\epsilon(r_S + r_R) + \gamma_I) + 2r_S \epsilon] \end{aligned} \quad [18]$$

115 As the parameters,  $\beta, \bar{k}, \bar{q}, \epsilon, r_S, r_I, r_R, \gamma_I > 0$ , it is easy to show that,

$$116 \quad |b_{rep.}| > |b_{red.}|, \quad [19]$$

$$117 \quad c_{rep.} < c_{red.}. \quad [20]$$

118 The above conditions allow us to re-express the inequality,  $R_0^{Rep.} > R_0^{Red.}$ , as

$$119 \quad \frac{b_{rep.} + \sqrt{b_{rep.}^2 - 4a_{rep.}c_{rep.}}}{\beta \bar{k}(\epsilon(r_S + r_R) + \gamma_I)} > \frac{b_{red.} + \sqrt{b_{red.}^2 - 4a_{red.}c_{red.}}}{\beta \bar{k}(\epsilon + \gamma_I)}. \quad [21]$$

120 When  $\bar{q} > 2$  (for a Poisson network, this is equivalent to  $\bar{k} > 1$  as  $\bar{q} = \bar{k} + 1$ ),

$$121 \quad R_0^{Rep.} > R_0^{Red.} \Rightarrow 1 < \frac{(\epsilon + \gamma_I) \sqrt{b_{rep.}^2 - 4a_{rep.}c_{rep.}}}{(\epsilon(r_S + r_R) + \gamma_I) \sqrt{b_{red.}^2 - 4a_{red.}c_{red.}}}. \quad [22]$$

122 For the parameter regions considered in Fig. 2 in the paper, the preceding condition holds and  $R_0^{Rep.} > R_0^{Red.}$ .

## 123 Legends for Dataset S1 to S3

### 124 SI Dataset S1 (DatasetS1.xlsx)

125 **Health care worker (HCW) survey:** The hospital is an approximately 1000-bed, academic, tertiary care center. We  
 126 administered a cross sectional egocentric survey of HCWs via RedCap to assess contact networks and demographic characteristics.  
 127 Inclusion criterion was all hospital staff present since the first local Covid-19 case. An estimated total of 4572 surveys were  
 128 distributed by email via departmental champions, and 583 surveys were submitted, of which 464 were valid after exclusion of  
 129 those who did not include job type or whose answers were non-interpretable. The effective response rate was 10%, representing  
 130 approximately 5% of the total HCW population. Administrative workers were poorly sampled (4 total). HCW types are defined  
 131 by role rather than title, grouping together those with similar duties and contact patterns. For example, ‘‘Nurse’’ includes  
 132 largely *unit-based* registered nurses, licensed practical nurses, nurse aids, patient care assistants, and support technicians. The  
 133 complete survey is included in the second tab of this spreadsheet; it includes more extensive questions, responses to which are  
 134 available with appropriate data sharing agreement per IRB approval.

### 135 SI Dataset S2 (DatasetS2.xlsx)

136 **HCW Absenteeism and Covid-19 Incidence:** Outcome variables were number of absences by day, unit, and HCW  
 137 type; Covid-19 related absence proportion; and total incidence. Data was aggregated by week. The weekly incidence curve in  
 138 Fig. 1 is inclusive of the whole hospital. Hospital absences are recorded as UTO (Unpaid Time Off) and PTO (Paid Time Off)  
 139 shifts missed. Covid work-related illness is considered PTO, so it has been manually added to the UTO count to calculate  
 140 total number missed shifts. We use UTO/PTO as a baseline operationalized measure of absenteeism, choosing not to make  
 141 assumptions about the average number of UTOs per Covid case (on average 1-2) or number of shifts missed per UTO (on  
 142 average 1-3). As such, our absence rates are a lower bound of the traditional Employee Absence Rate, which counts ‘‘Days  
 143 Absent’’ in the denominator instead of UTO and PTOs. Baseline (weighted average) weekly absenteeism across the 6 units for  
 144 the same month in 2019 ranged from 3-5%, with an average of 4.2%, expressed by the dotted line in Fig. 1.

145 **References**

- 146 1. C Llena, D Juher, J Saldana, On the early epidemic dynamics for pairwise models. *J. theoretical biology* **352**, 71–81 (2014).  
147 2. MJ Keeling, The effects of local spatial structure on epidemiological invasions. *Proc. Royal Soc. London. Ser. B: Biol. Sci.*  
148 **266**, 859–867 (1999).
